# Supplementary material
Source: PubMed Central journal article supplement (PMC4613956)
Supplement: supp_115.225581_jpet225581Supplemental_Data.pdf [file supp_115.225581_jpet225581Supplemental_Data.pdf]

SUPPLEMENTAL INFORMATION

Journal of Pharmacology and Experimental Therapeutics

**Loss of Abcc1 (Mrp1) potentiates chronic doxorubicin-induced cardiac dysfunction in mice**

Wei Zhang, Jun Deng, Manjula Sunkara, Andrew J. Morris, Chi Wang,  
Daret St Clair, and Mary Vore

Supplemental figure 1

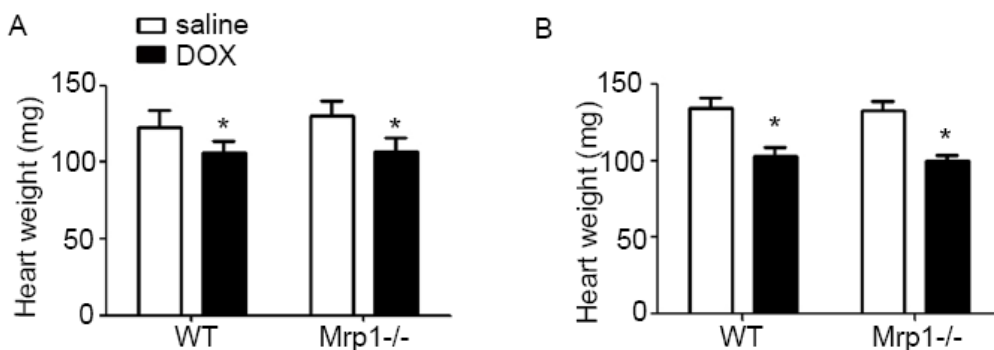

**Supplemental figure 1: Heart weight change in WT and Mrp1-/- mice following chronic DOX treatment.** WT and Mrp1-/- mice were administered intraperitoneal DOX with protocols A (A) or B (B). Two weeks later, the hearts were removed immediately and weighed. Each bar represents the mean  $\pm$  SE. (In figure A, n= 12 for saline treated group; n=12 for DOX treated WT mice; n=9 for DOX treated Mrp1-/- mice; in figure B,

n=6 for each group, \*,  $p < 0.05$  DOX vs. saline of the same genotype by Newman-Keuls multiple comparison test after one-way ANOVA)

Supplemental figure 2

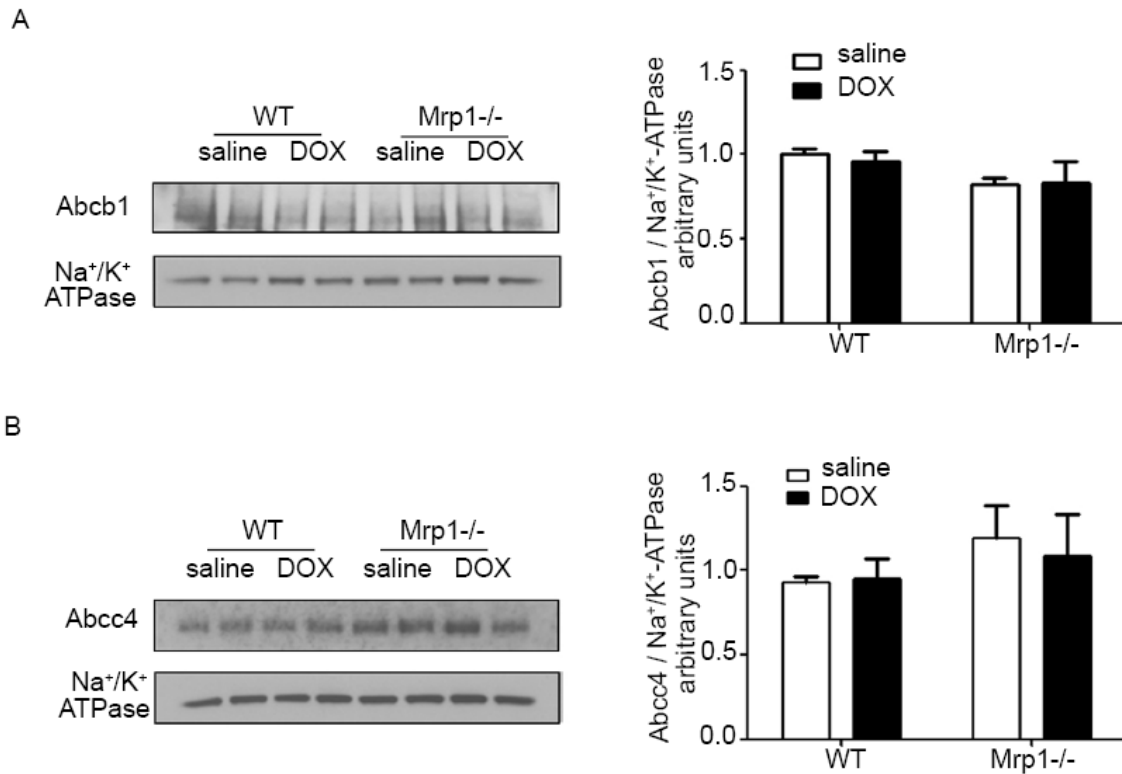

**Supplemental figure 2: Protein expressions of Abcb1 and Abcc4 in mouse heart.**

Mice were treated with protocol B, and the protein level of Abcb1 and Abcc4 were measured 2 weeks after the last dose of DOX by real time PCR. Each bar represents the mean  $\pm$  SE. (n = 3)
